# Supplementary material for: Hierarchical SnO2 architectures: controllable growth on graphene by atmospheric pressure chemical vapour deposition and application in cataluminescence gas sensor
Source: Royal Society of Chemistry journal article supplement (doi:10.1039/c3ce42538j), 2014-01-01
Supplement: c3ce42538j1.pdf [file c3ce42538j1.pdf]

**Hierarchical SnO<sub>2</sub> Architectures: Controllable Growth on  
Graphene by Atmospheric Pressure Chemical Vapour  
Deposition and Application in Cataluminescence Gas Sensor**

Lingzhu Yu,<sup>a</sup> Lichun Zhang,<sup>a</sup> Hongjie Song,<sup>a</sup> Xiaoming Jiang,<sup>b</sup> Xiandeng Hou,<sup>b</sup> and  
Yi Lv<sup>\*,a</sup>

<sup>a</sup>Key Laboratory of Green Chemistry & Technology, Ministry of Education, College of  
Chemistry, Sichuan University, Chengdu, Sichuan 610064, China.

<sup>b</sup>Analytical & Testing Center, Sichuan University, Chengdu, Sichuan 610064, China.

**Corresponding Author:** Professor Yi Lv, Key Laboratory of Green Chemistry &  
Technology, Ministry of Education, College of Chemistry, Sichuan University, Chengdu,  
Sichuan 610064, China. Tel. & Fax +86-28-8541-2798. E-mail: [lvyy@scu.edu.cn](mailto:lvyy@scu.edu.cn)

## Supporting Information

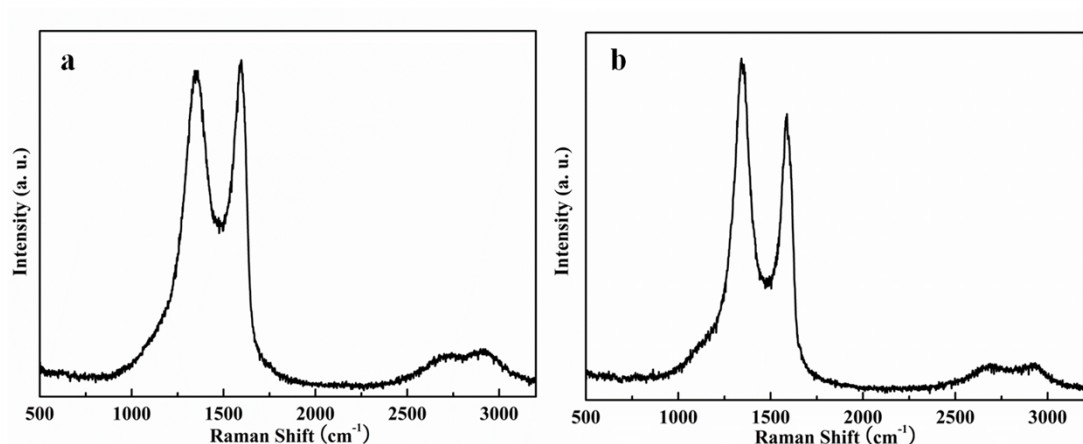

**Fig. S1** Raman spectra of (a) TRGO substrate and (b) CRGO substrate.

As shown in Fig. S1a, the Raman spectrum of TRGO was characterized by two prominent bands at 1360 and 1597  $\text{cm}^{-1}$ , which corresponded to the D and G modes. The G band arose from the first-order scattering of the  $E_{2g}$  mode,<sup>1, 2</sup> corresponding to ordered  $\text{sp}^2$ -bonded carbon atoms. However, the D band was ascribed to edges, other defects, and disordered carbon atoms.<sup>3, 4</sup>

As shown in Fig. S1b, the Raman spectrum of CRGO contained both D and G bands (at 1342 and 1588  $\text{cm}^{-1}$ , respectively). The D band at 1342  $\text{cm}^{-1}$  became prominent with an increased D/G intensity ratio of 1.18 for CRGO. This change suggested a decrease in the average size of the  $\text{sp}^2$  domains upon reduction of the exfoliated GO.<sup>1</sup>

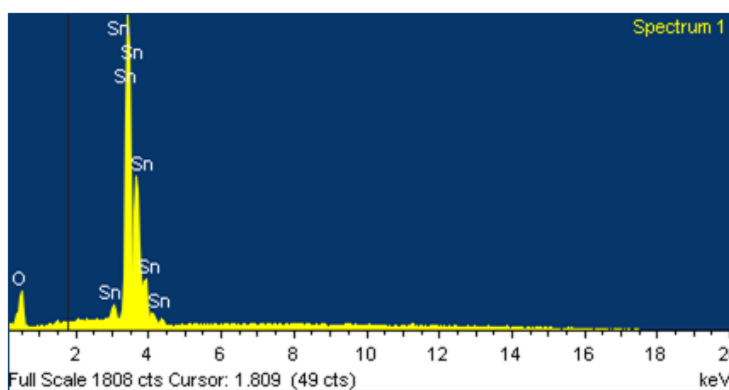

**Fig. S2** EDX spectrum of  $\text{SnO}_2/\text{TRGO}$  materials deposited at 580  $^{\circ}\text{C}$  for 60 min.

**Table S1** Binding energy and percentage of functional groups in C1s XPS spectra of TRGO

| TRGO <sup>a</sup>   |        |        |        |        | TRGO <sup>b</sup>   |        |        |       |        |
|---------------------|--------|--------|--------|--------|---------------------|--------|--------|-------|--------|
| Functional groups   | C=C    | C-O    | C=O    | O=C-OH | Functional groups   | C=C    | C-O    | C=O   | O=C-OH |
| Binding energy (eV) | 284.6  | 285.7  | 287.3  | 289.2  | Binding energy (eV) | 284.6  | 285.8  | 287.5 | 289.5  |
| Relative percentage | 52.99% | 27.95% | 10.62% | 8.45%  | Relative percentage | 60.53% | 27.48% | 6.03% | 5.96%  |

<sup>a</sup> The bare TRGO

<sup>b</sup> TRGO after deposition SnO<sub>2</sub> materials.

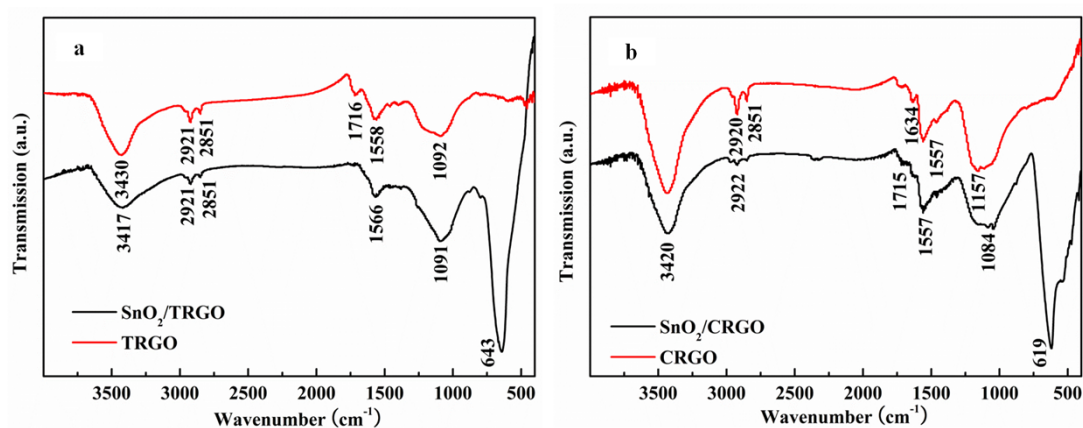**Fig. S3** FT-IR spectra of (a) bare TRGO and SnO<sub>2</sub>/TRGO materials deposited at 580 °C for 60 min and (b) bare CRGO and SnO<sub>2</sub>/CRGO materials deposited at 580 °C for 60 min.

The FT-IR spectrum of TRGO (Fig. S3a) showed the presence of residual oxygenated functional groups. The 1092 cm<sup>-1</sup> assigned to C-O stretching vibrations, 1558 cm<sup>-1</sup> assigned to C=C stretching vibrations, which was red shifts because of the calcination treatment. The 1716 cm<sup>-1</sup> assigned to carbonyl or carboxyl stretching vibrations, 3430 cm<sup>-1</sup> assigned to -OH stretching vibrations. After deposition SnO<sub>2</sub>, the peak of 1716 cm<sup>-1</sup> disappeared, revealing the TRGO was further reduced. The new peak of 643 cm<sup>-1</sup> corresponded to SnO<sub>2</sub>.

Fig. S3b showed the FT-IR spectrum of CRGO. The 1157 cm<sup>-1</sup> assigned to C-O stretching vibrations, 1557 cm<sup>-1</sup> and 1634 cm<sup>-1</sup> assigned to C=C stretching vibrations, the 1557 cm<sup>-1</sup> was red shifts because of the calcination treatment. The 1715 cm<sup>-1</sup> assigned to carbonyl or carboxyl stretching vibrations, 3420 cm<sup>-1</sup> assigned to -OH stretching vibrations. After deposition SnO<sub>2</sub>, the corresponding peaks had no significant change. The new peak of 619 cm<sup>-1</sup> corresponded to SnO<sub>2</sub>.

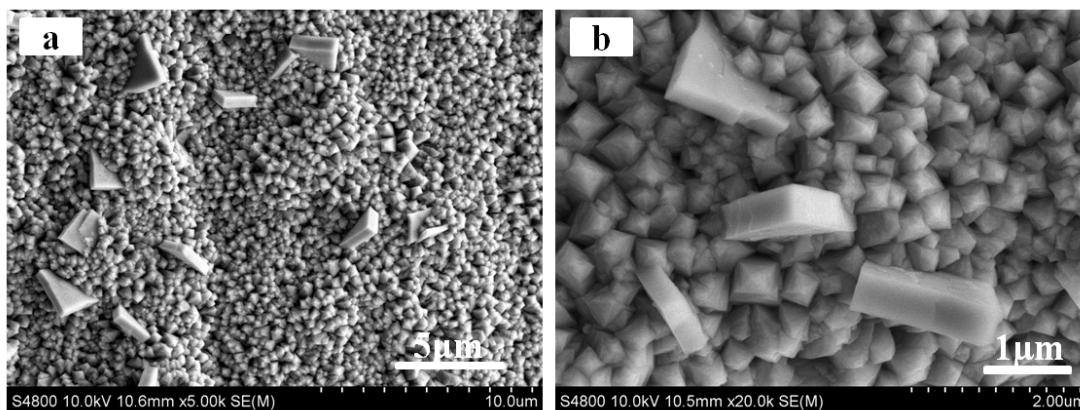

**Fig. S4** (a) FE-SEM image of SnO<sub>2</sub>/TRGO nanobrick@nanorod hybrid structure and (b) the corresponding high-magnification SEM image.

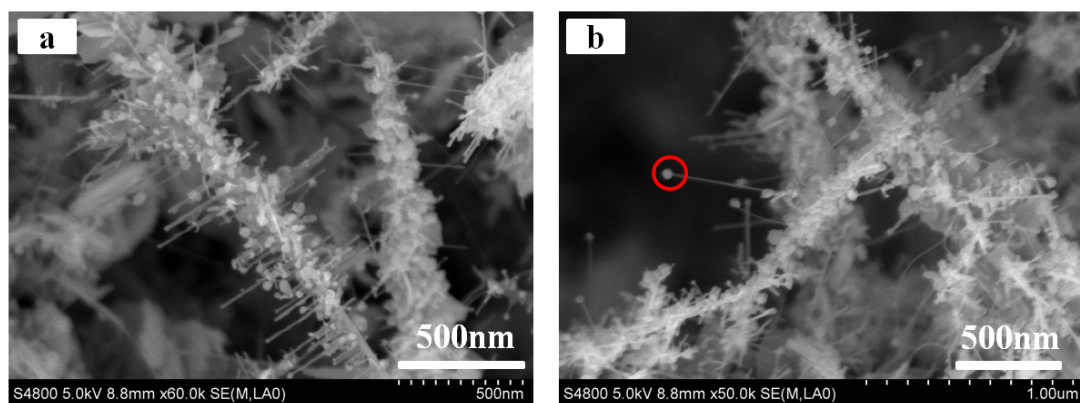

**Fig. S5** (a and b) High-magnification FE-SEM images of SnO<sub>2</sub> dendrite structure deposited at 620 °C for 60 min, which consisted of nanorods and nanowires with spherical particles located on the top.

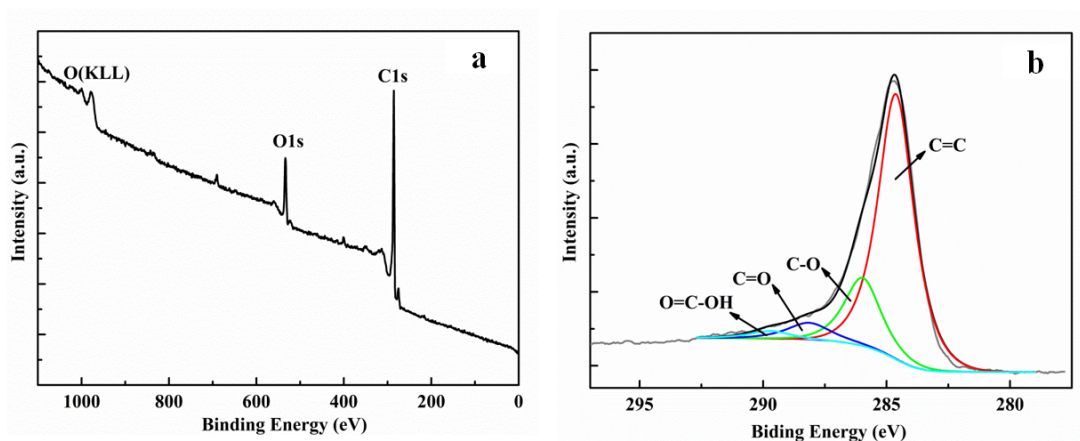

**Fig. S6** (a) XPS spectrum of CRGO. (b) C 1s peaks of CRGO.

**Table S2** Binding energy and percentage of functional groups in C1s XPS spectra of CRGO

| Functional groups   | C=C    | C-O    | C=O   | O=C-OH |
|---------------------|--------|--------|-------|--------|
| Binding energy (eV) | 284.6  | 286.0  | 288.1 | 289.7  |
| Relative percentage | 72.63% | 19.09% | 5.77% | 2.51%  |

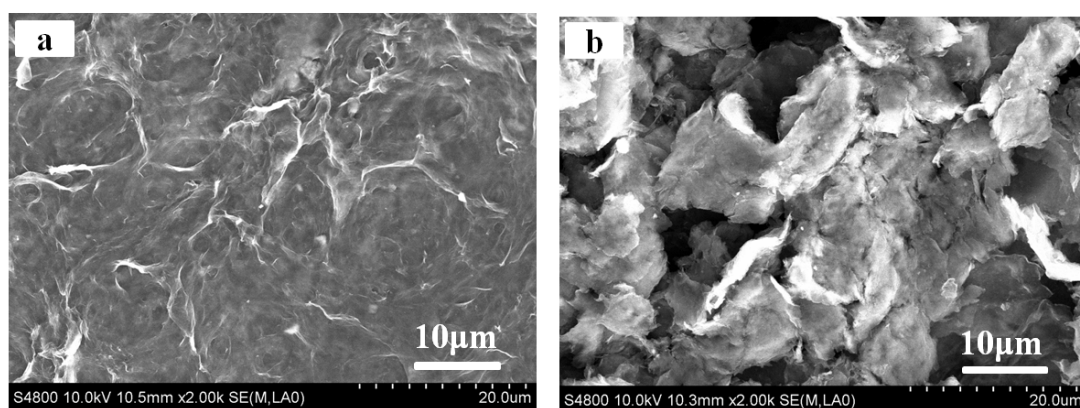

**Fig. S7** (a) FE-SEM image of bare TRGO. (b) FE-SEM image of bare CRGO.

## References

1. F. Tuinstra, J. L. Koenig, *J Chem Phys*, 1970, **53**, 1126.
2. S. Stankovich, D. A. Dikin, R. D. Piner, K. A. Kohlhaas, A. Kleinhammes, Y. Y. Jia, Y. Wu, S. T. Nguyen, R. S. Ruoff, *Carbon*, 2007, **45**, 1558.
3. J. I. Paredes, S. Villar-Rodil, P. Solis-Fernandez, A. Martinez-Alonso, J. M. D. Tascon, *Langmuir*, 2009, **25**, 5957.
4. H. J. Song, L. Y. Hao, Y. F. Tian, X. Y. Wan, L. C. Zhang, Y. Lv, *ChemPlusChem*, 2012, **77**, 379.
